# Supplementary material for: Molecular Detection of Potato Viruses in Bangladesh and Their Phylogenetic Analysis
Source: PubMed Central journal article supplement (PMC7690588; doi:10.3390/plants9111413), 2020-10-22
Supplement: plants-09-01413-s001.pdf [file plants-09-01413-s001.pdf]

Article

# Molecular Detection of Potato Viruses in Bangladesh and Their Phylogenetic Analysis

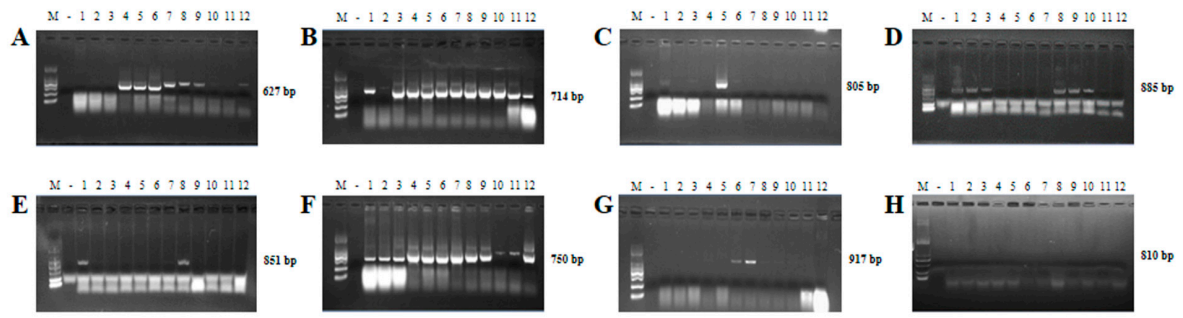

Figure S1.
